# Supplementary material for: High red luminescence intensity under sunlight exposure of a PMMA polymer doped with a tetrakis Eu3+ β-diketonate complex containing a benzimidazolium counterion
Source: Royal Society of Chemistry journal article supplement (doi:10.1039/d4ra06451h), 2025-01-01
Supplement: d4ra06451h1.pdf [file d4ra06451h1.pdf]

## Supporting Information

### High Red Luminescence Intensity under Sunlight Exposure of a PMMA Polymer doped with Tetrakis Eu<sup>3+</sup> $\beta$ -diketonate Complex containing Benzimidazolium Counterion

Israel P. Assunção,<sup>\*a,b</sup> Israel F. Costa,<sup>a</sup> Lucca Blois,<sup>a</sup> Maria Claudia F. C. Felinto,<sup>c</sup> Victor M. Deflon,<sup>d</sup> Rômulo A. Ando,<sup>a</sup> Oscar L. Malta<sup>e</sup> and Hermi F. Brito<sup>a\*</sup>

<sup>a</sup> Department of Fundamental Chemistry, Institute of Chemistry, University of São Paulo, 05508-000 São Paulo, SP, Brazil. Email: ipassuncao@ifsp.edu.br.

<sup>b</sup> Federal Institute of Education, Science and Technology of São Paulo, São Paulo, 01109-010, Brazil.

<sup>c</sup> Nuclear and Energy Research Institute – IPEN/CNEN, 05508-000, São Paulo, SP, Brazil.

<sup>d</sup> Institute of Chemistry of São Carlos, University of São Paulo, 13566-590, São Carlos, Brazil.

<sup>e</sup> Department of Fundamental Chemistry, Federal University of Pernambuco, 50670-901, Recife, PE, Brazil.

Corresponding Authors: ipassunc@iq.usp.br; hefbrito@iq.usp.br

**ESI(+), MeOH**

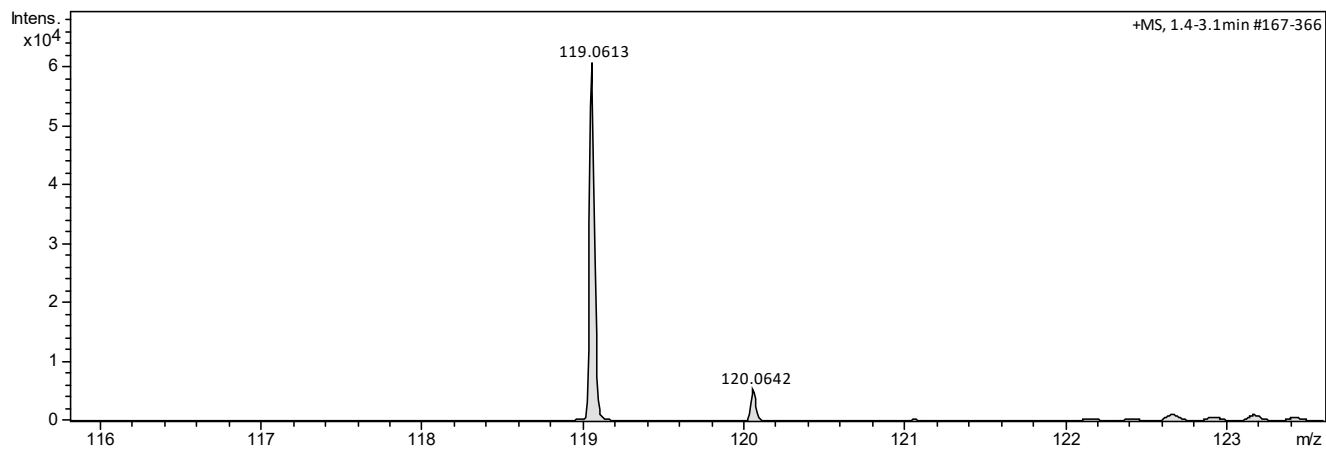

**Figure S1:** ESI(+)-MS Spectrum of Bzim[Eu(tta)<sub>4</sub>], *m/z* corresponds to Bzim<sup>+</sup>.

**ESI(-), MeOH**

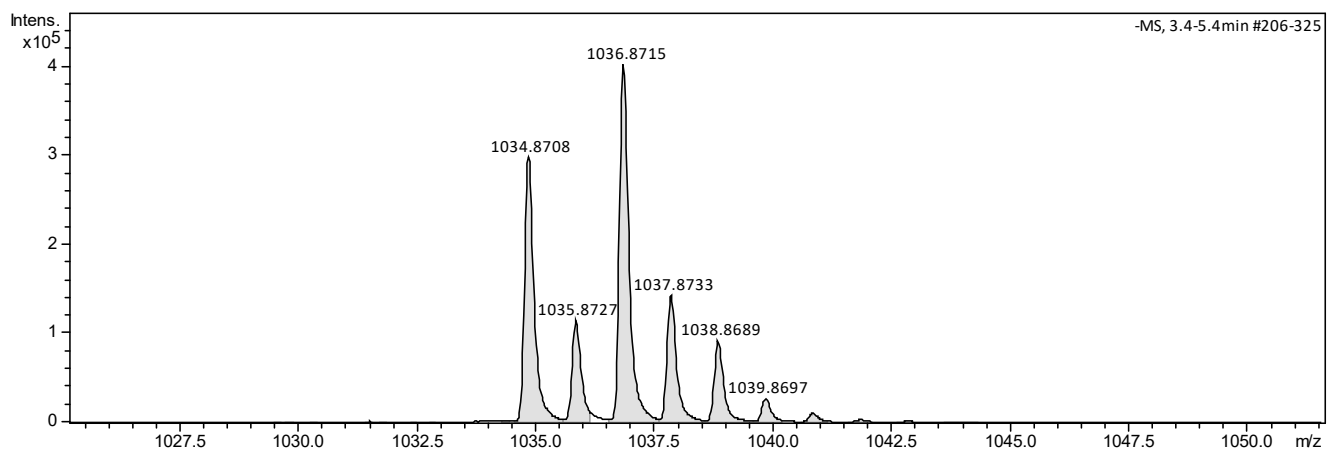

**Figure S2:** ESI(-)-MS Spectrum of Bzim[Eu(tta)<sub>4</sub>], *m/z* corresponds to [Eu(tta)<sub>4</sub>]<sup>-</sup>.

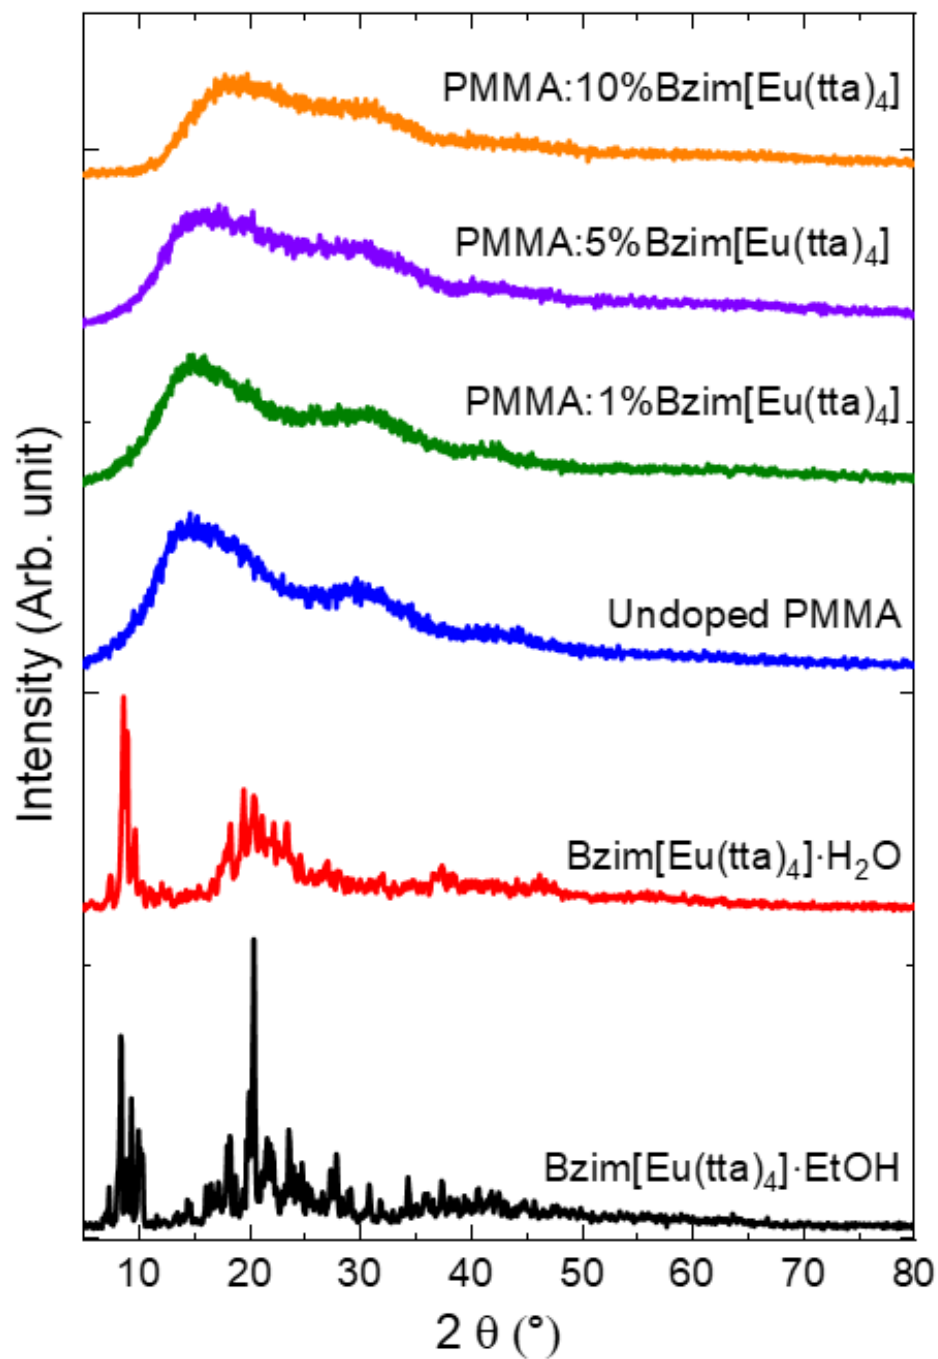

**Figure S3.** X-ray powder diffraction patterns (XPD) of the Bzim[Eu(tta)<sub>4</sub>]·EtOH (black line), Bzim[Eu(tta)<sub>4</sub>]·H<sub>2</sub>O (red line), undoped PMMA (blue line) and PMMA:x% Bzim[Eu(tta)<sub>4</sub>], where x: 1 (green line), 5 (purple line) and 10% (orange line) w/w. All data were recorded at room temperature in the 5–80° range.

a)

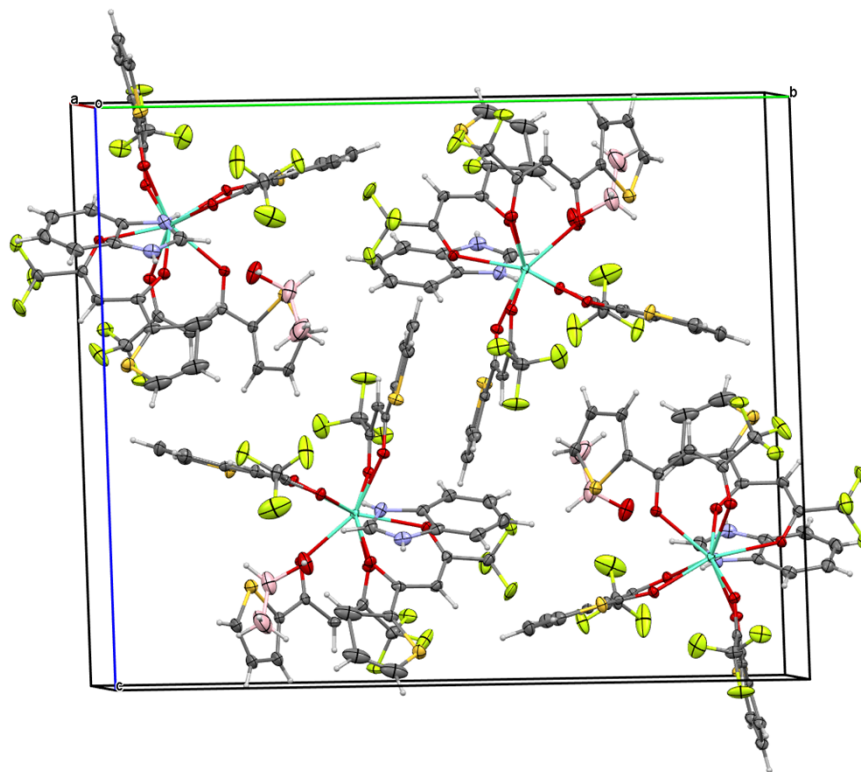

b)

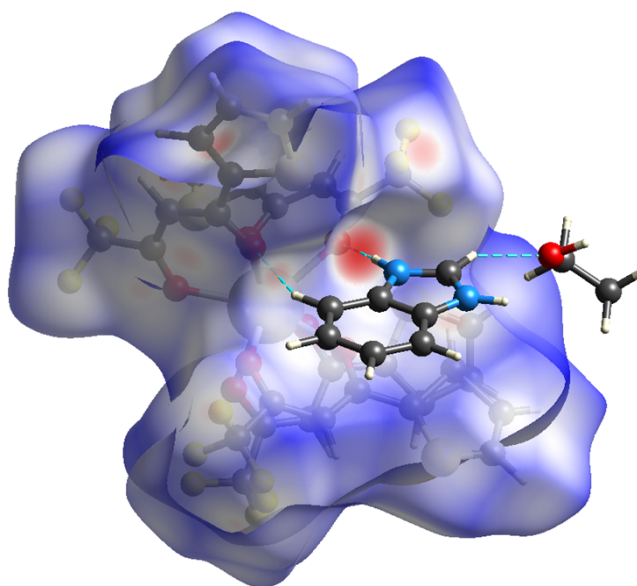

**Figure S4.** Crystal packing diagram (one unit cell) for the Bzim[Eu(tta)<sub>4</sub>]·EtOH structure. The packing diagram is viewed approximately along the crystallographic a-axis, EtOH solvent molecules highlighted in pink for clarity (a) and Hirshfeld surfaces mapped with  $d_{\text{norm}}$  for the Bzim[Eu(tta)<sub>4</sub>]·EtOH (b)

**Table S1.** Single crystal data and structure refinement for Bzim[Eu(tta)<sub>4</sub>] $\cdot$ EtOH complex.

| <b>Complex</b>                            | <b>Bzim[Eu(tta)<sub>4</sub>]<math>\cdot</math>EtOH</b>                                         |                                |
|-------------------------------------------|------------------------------------------------------------------------------------------------|--------------------------------|
| Empirical formula                         | C <sub>41</sub> H <sub>29</sub> EuF <sub>12</sub> N <sub>2</sub> O <sub>9</sub> S <sub>4</sub> |                                |
| Formula weight                            | 1201.86                                                                                        |                                |
| Temperature                               | 100(2) K                                                                                       |                                |
| Wavelength                                | 0.71073 Å                                                                                      |                                |
| Crystal system                            | Monoclinic                                                                                     |                                |
| Space group                               | P 21/c                                                                                         |                                |
| Unit cell dimensions                      | a = 10.2374(4) Å                                                                               | $\alpha = 90^\circ$ .          |
|                                           | b = 23.0415(9) Å                                                                               | $\beta = 104.5740(10)^\circ$ . |
|                                           | c = 19.8634(8) Å                                                                               | $\gamma = 90^\circ$ .          |
| Volume/Å <sup>3</sup>                     | 4534.7(3)                                                                                      |                                |
| Z                                         | 4                                                                                              |                                |
| Density (calculated)                      | 1.760 Mg/m <sup>3</sup>                                                                        |                                |
| Absorption coefficient                    | 1.673 mm <sup>-1</sup>                                                                         |                                |
| F(000)                                    | 2384                                                                                           |                                |
| Crystal size                              | 0.260 x 0.060 x 0.030 mm <sup>3</sup>                                                          |                                |
| Theta range for data collection           | 1.379 to 26.412°.                                                                              |                                |
| Index ranges                              | -12 $\leq$ h $\leq$ 8, -28 $\leq$ k $\leq$ 28, -24 $\leq$ l $\leq$ 24                          |                                |
| Reflections collected                     | 59993                                                                                          |                                |
| Independent reflections                   | 9297 [R(int) = 0.0454]                                                                         |                                |
| Completeness to theta = 25.242°           | 100.0 %                                                                                        |                                |
| Max. and min. transmission                | 0.7454 and 0.6243                                                                              |                                |
| Refinement method                         | Full-matrix least-squares on F <sup>2</sup>                                                    |                                |
| Data / restraints / parameters            | 9297 / 6 / 614                                                                                 |                                |
| Goodness-of-fit on F <sup>2</sup>         | 1.038                                                                                          |                                |
| Final R indices [I $\geq$ 2 $\sigma$ (I)] | R1 = 0.0289, wR2 = 0.0616                                                                      |                                |
| R indices (all data)                      | R1 = 0.0366, wR2 = 0.0645                                                                      |                                |
| Extinction coefficient                    | n/a                                                                                            |                                |
| Largest diff. peak and hole               | 1.032 and -0.856 e.Å <sup>-3</sup>                                                             |                                |

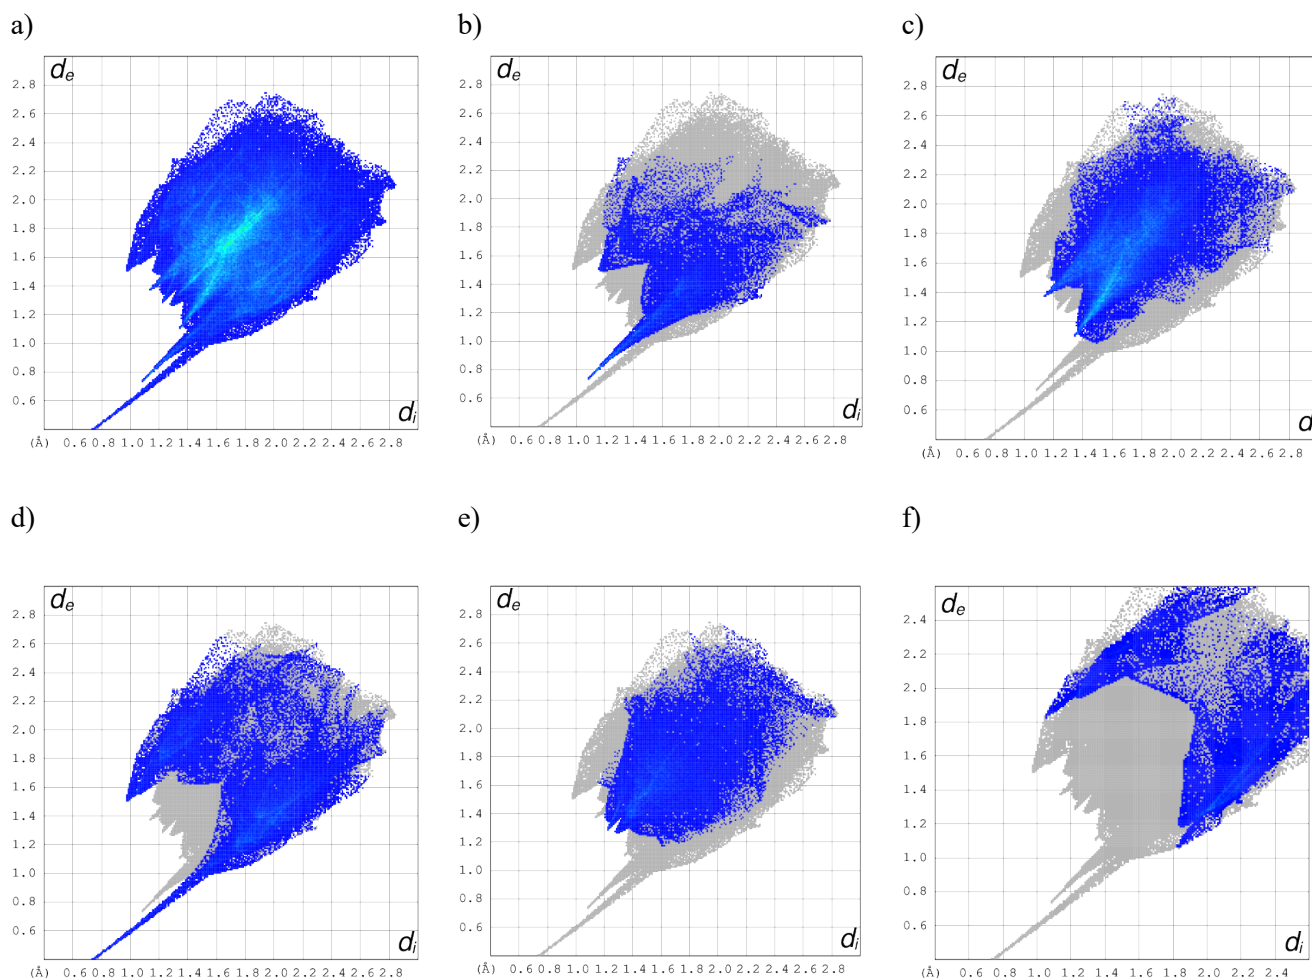

**Figure S5.** Fingerprint plots: a) all (100%), b) [O $\cdots$ H]/[H $\cdots$ O] (9.4% ), c) [F $\cdots$ H]/[H $\cdots$ F] (32.4%), d) [C $\cdots$ H]/[H $\cdots$ C] (18.2%), e) [H $\cdots$ H]/[H $\cdots$ H] (15.7%), and f) [S $\cdots$ H]/[H $\cdots$ S] (7.4%) contacts for Bzim[Eu(tta)<sub>4</sub>] $\cdot$ EtOH displaying percentages of contacts contributed to the total Hirshfeld surface area of the complex.

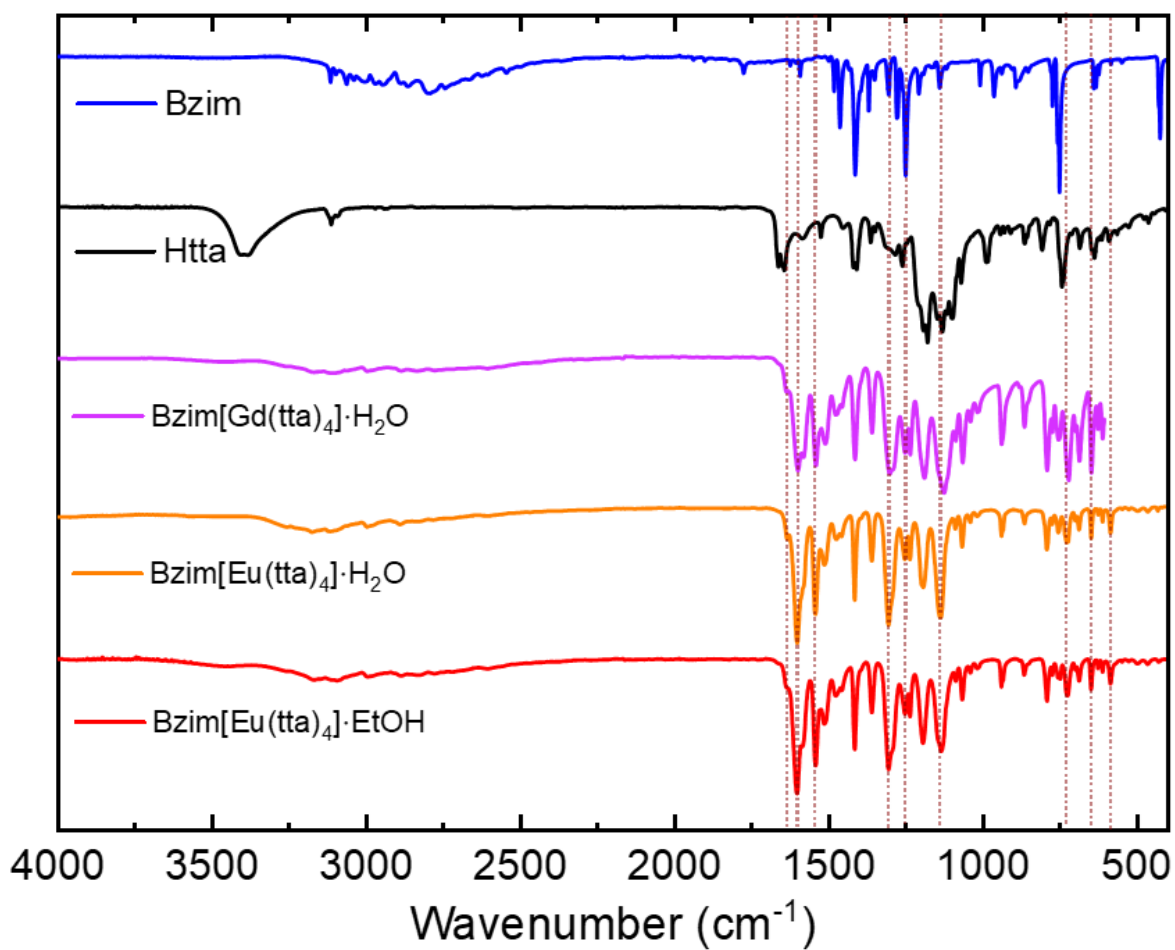

**Figure S6.** Infrared absorption spectra (FTIR) of the Bzim (blue line), Htta ligand (black line) and Bzim[Ln(tta)<sub>4</sub>]·H<sub>2</sub>O, where Ln<sup>3+</sup>: Gd (purple line) and Eu (red line) complexes, besides the Bzim[Eu(tta)<sub>4</sub>]·EtOH. All spectra were registered using ATR mode with a spectral resolution of 2.0 cm<sup>-1</sup> in the range of 4000-400 cm<sup>-1</sup>.

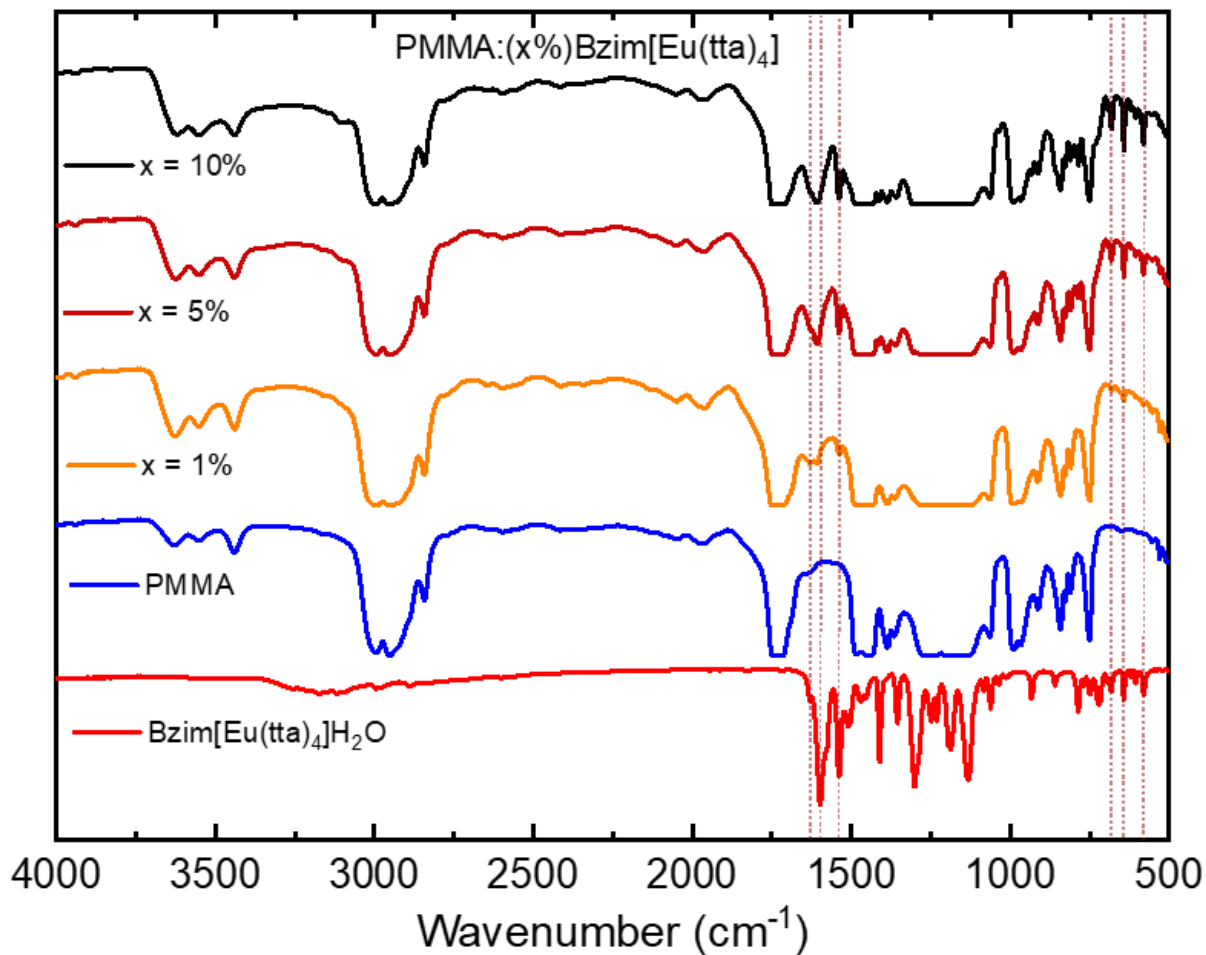

**Figure S7.** FTIR spectra for the Bzim[Eu(tta)<sub>4</sub>]·H<sub>2</sub>O (red line) complex, non-doped PMMA (blue line) and their corresponding PMMA:(x%)Bzim[Eu(tta)<sub>4</sub>] doped films, where x = 1 (orange line), 5 (dark red line), and 10 (black line). All data were recorded in the spectral interval of 4000 to 400 cm<sup>-1</sup> with a spectral resolution of 2.0 cm<sup>-1</sup>.



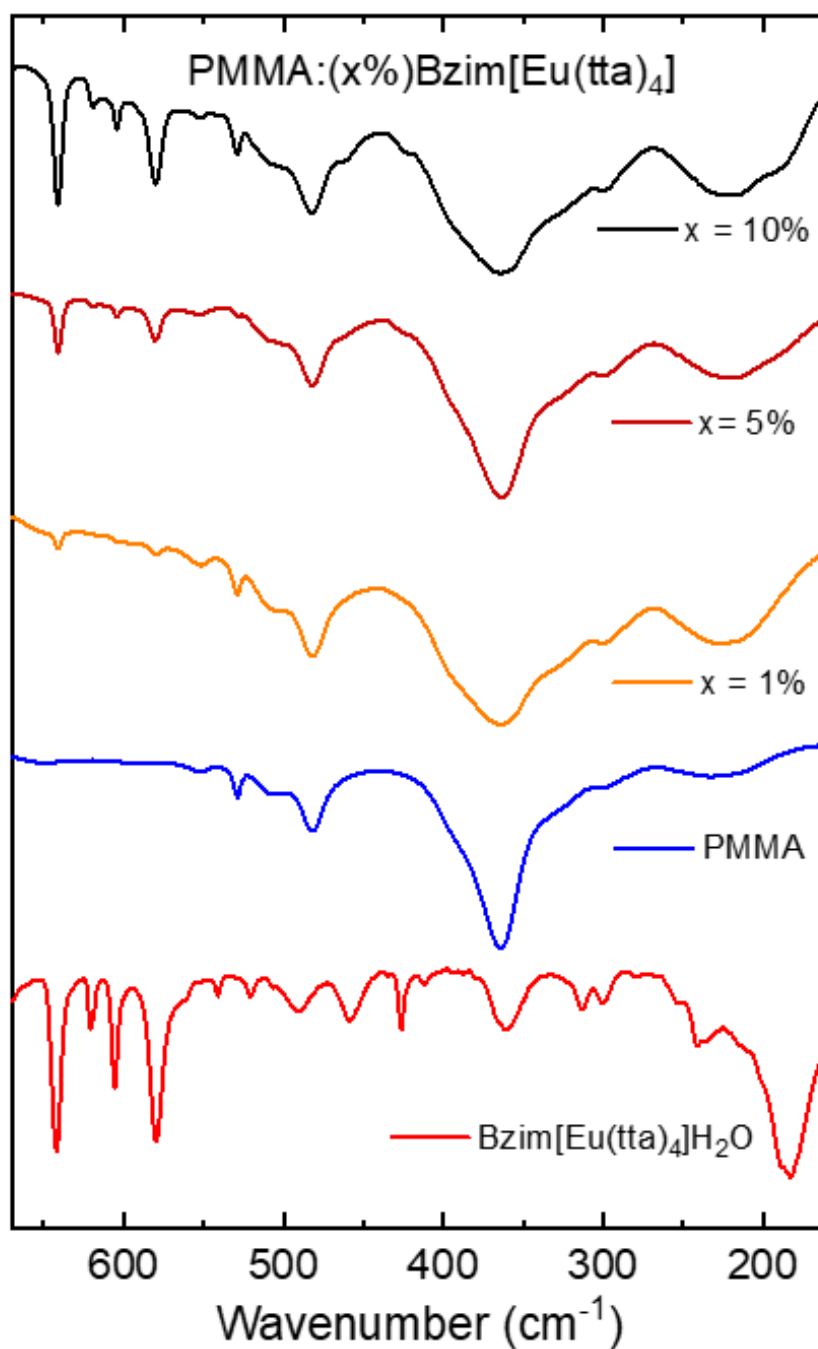

**Figure S8.** Far-FTIR spectra for the Bzim[Eu(tta)<sub>4</sub>]·H<sub>2</sub>O (red line) complex, non-doped PMMA (blue line) and their corresponding PMMA:(x%)Bzim[Eu(tta)<sub>4</sub>] doped films, where x = 1 (orange line), 5 (dark red line), and 10 (black line). All data were recorded in the spectral interval of 670 to 150 cm<sup>-1</sup> with a spectral resolution of 2.0 cm<sup>-1</sup>.

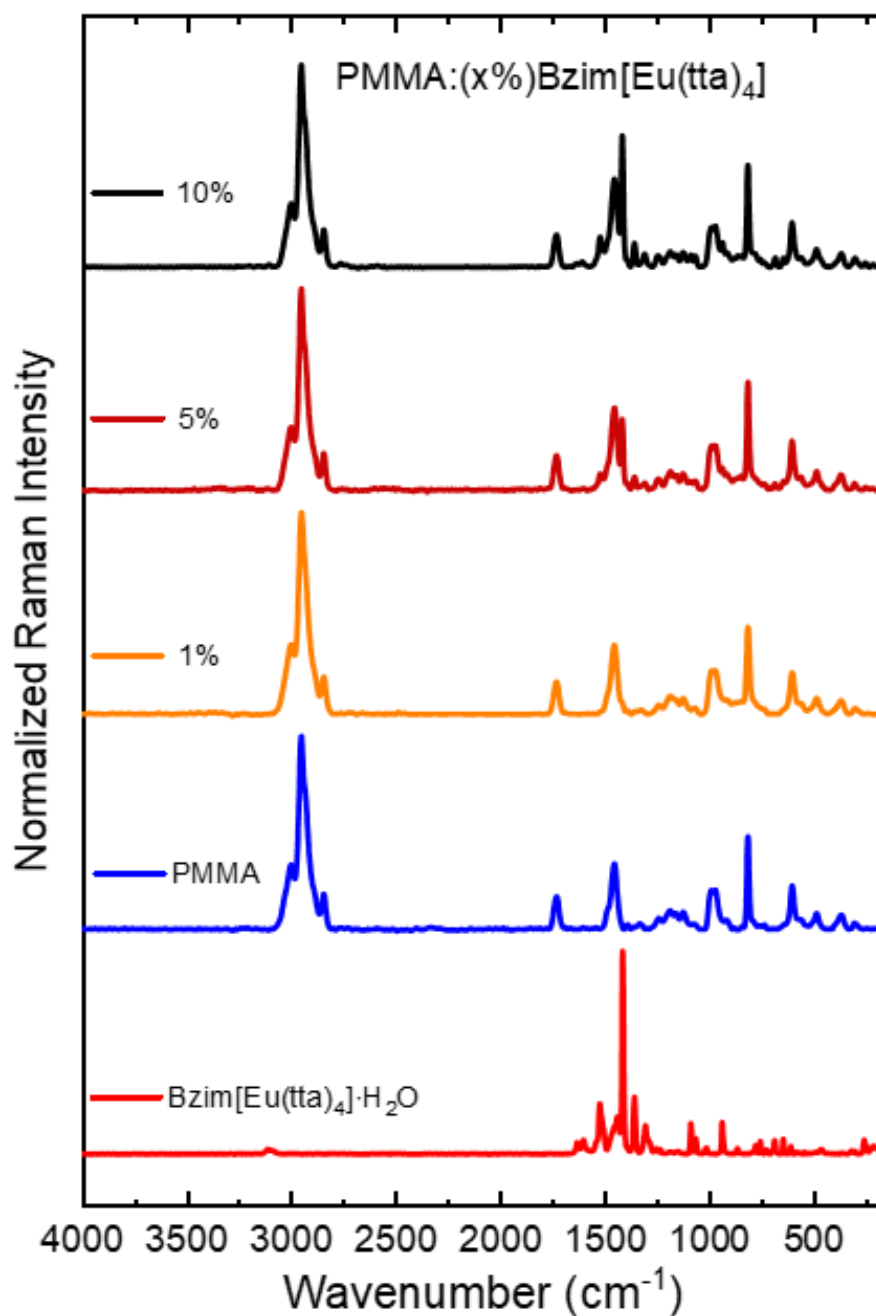

**Figure S9.** Raman Scattering spectra for Bzim[Eu(tta)<sub>4</sub>]·H<sub>2</sub>O (red line) complex, non-doped PMMA (blue line) and their corresponding PMMA:(x%)Bzim[Eu(tta)<sub>4</sub>] doped films, where x = 1 (orange line), 5 (dark red line), and 10 (black line). All data were collected in the spectral interval of 4000 to 200 cm<sup>-1</sup>, at 1064 nm excitation laser.

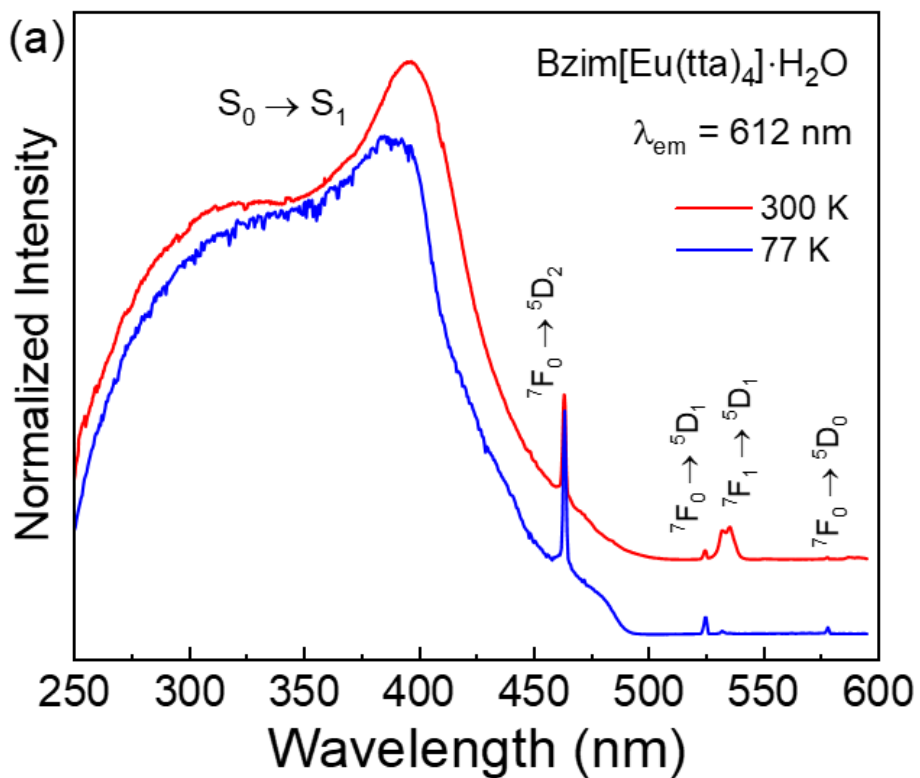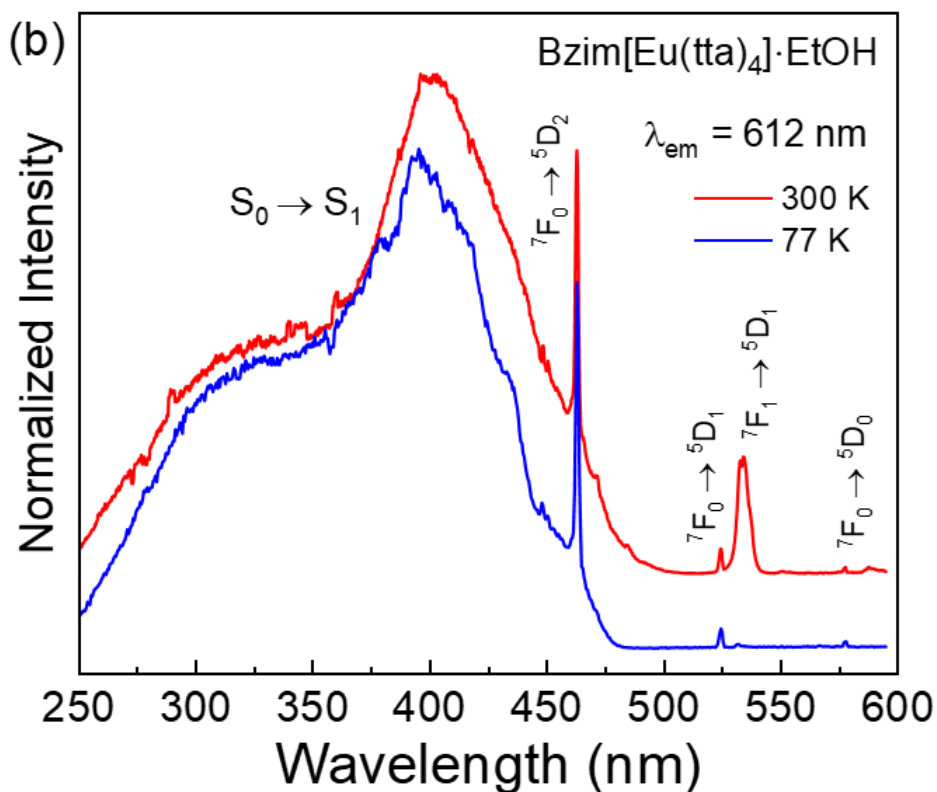

**Figure S10.** Excitation spectra of the solid-state Bzim[Eu(tta)<sub>4</sub>] L, L: H<sub>2</sub>O (a) or EtOH (b) complexes, recorded under 300 (red line) and 77 K (blue line) in the 250 – 600 nm range monitoring the emission at the hypersensitive  ${}^5D_0 \rightarrow {}^7F_2$  transition ( $\lambda_{em} = 612 \text{ nm}$ ) of the Eu<sup>3+</sup> ion.

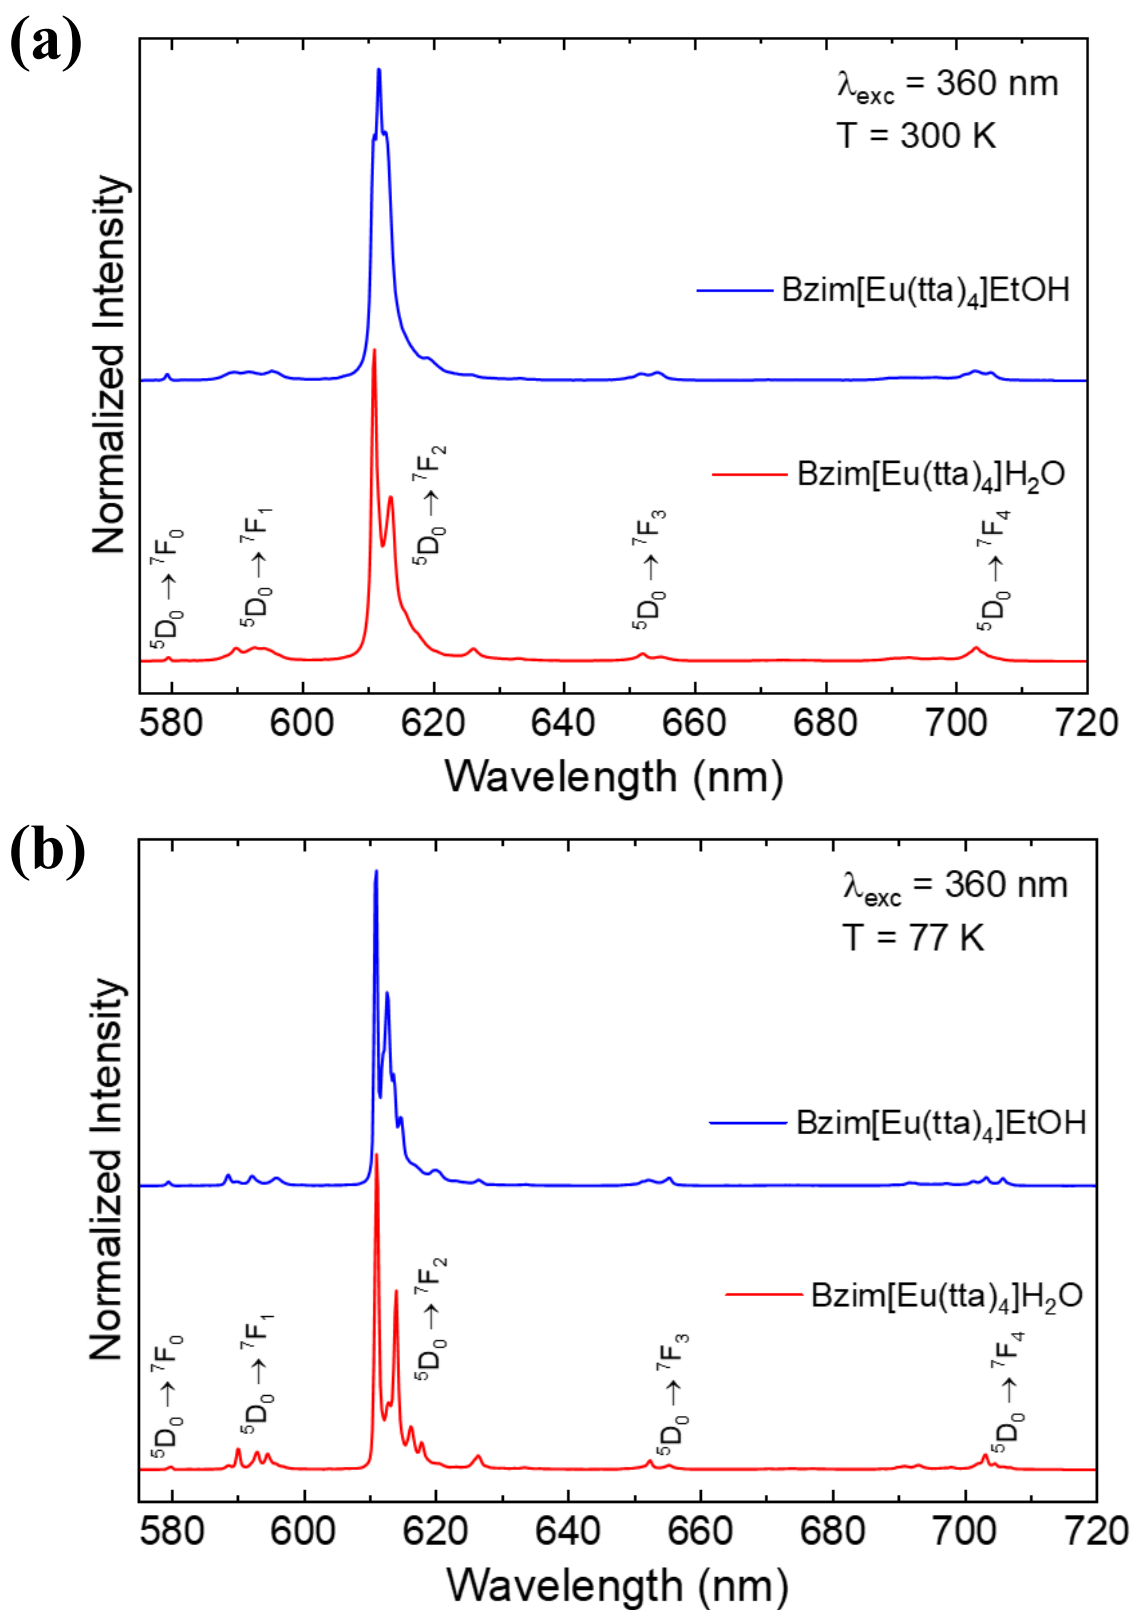

**Figure S11.** Emission spectra of the solid-state Bzim[Eu(tta)<sub>4</sub>] L, L:EtOH (blue line) or H<sub>2</sub>O (red line) complexes with excitation at 360 nm. The spectra were recorded under 300 (a) and 77 K (b) in the range of 575 to 720 nm.

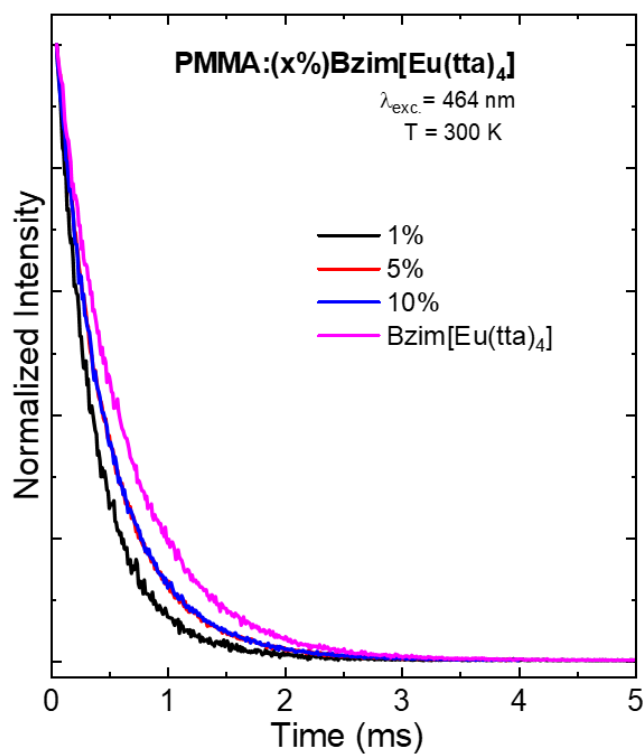

**Figure S12.** Luminescence decay curves of the [Bzim][Eu(tta)<sub>4</sub>] complex and their corresponding PMMA:(x%)Bzim[Eu(tta)<sub>4</sub>] doped films, where x = 1, 5 and 10. All data were determined under 300 K with excitation at the <sup>7</sup>F<sub>0</sub>→<sup>5</sup>D<sub>2</sub> transition at 464 nm.

**Table S2.** CIE diagram coordinates of the PMMA:(x%)Bzim[Eu(tta)<sub>4</sub>] doped films, where x = 1, 5 and 10. All data were determined under 300 K with excitation at 254 (UVC), 310 (UVB), 405 (UVA) nm and under sunlight radiation.

| $\lambda_{\text{ex.}}(\text{nm})$ | 254   |       | 310   |       | 405   |       | Sunlight |       |
|-----------------------------------|-------|-------|-------|-------|-------|-------|----------|-------|
|                                   | x     | y     | x     | y     | x     | y     | x        | y     |
| PMMA:(1%)Bzim[Eu(tta)]            | 0.668 | 0.332 | 0.669 | 0.331 | 0.669 | 0.330 | 0.655    | 0.345 |
| PMMA:(5%)Bzim[Eu(tta)]            | 0.668 | 0.332 | 0.668 | 0.332 | 0.669 | 0.331 | 0.678    | 0.322 |
| PMMA:(10%)Bzim[Eu(tta)]           | 0.668 | 0.331 | 0.668 | 0.332 | 0.668 | 0.332 | 0.669    | 0.331 |
